# Supplementary material for: A comprehensive in vitro and in vivo study of ZnO nanoparticles toxicity
Source: Royal Society of Chemistry journal article supplement (doi:10.1039/c3tb20251h), 2013-01-01
Supplement: c3tb20251h.pdf [file c3tb20251h.pdf]

## Supplementary Information

### A comprehensive *in vitro* and *in vivo* study of ZnO nanoparticles toxicity

Tae-Keun Hong,<sup>a,†</sup> Nirmalya Tripathy,<sup>b,†</sup> Hyun-Jin Son,<sup>c</sup> Ki-Tae Ha,<sup>a</sup> Han-Sol Jeong<sup>a,\*</sup> and Yoon-Bong Hahn<sup>b,\*</sup>

<sup>a</sup>School of Korean Medicine, Division of Applied Medicine, Pusan National University, 3-3 Beomeo-ri, Yangsan-si 626-870 (Korea). E-mail: [jhsol33@pusan.ac.kr](mailto:jhsol33@pusan.ac.kr)

<sup>b</sup>Dept. of BIN Fusion Technology, School of Semiconductor and Chemical Engineering, Chonbuk National University, 567 Baekje-daero, Deokjin-gu, Jeonju 561-756 (Korea). E-mail: [ybhahn@chonbuk.ac.kr](mailto:ybhahn@chonbuk.ac.kr)

<sup>c</sup>Dept. of Pathology, Eulji University School of Medicine, 143-5 Yongdu-dong, Jung-gu, Daejeon 301-746 (Korea).

<sup>†</sup>TKH and NT contributed equally to this work.

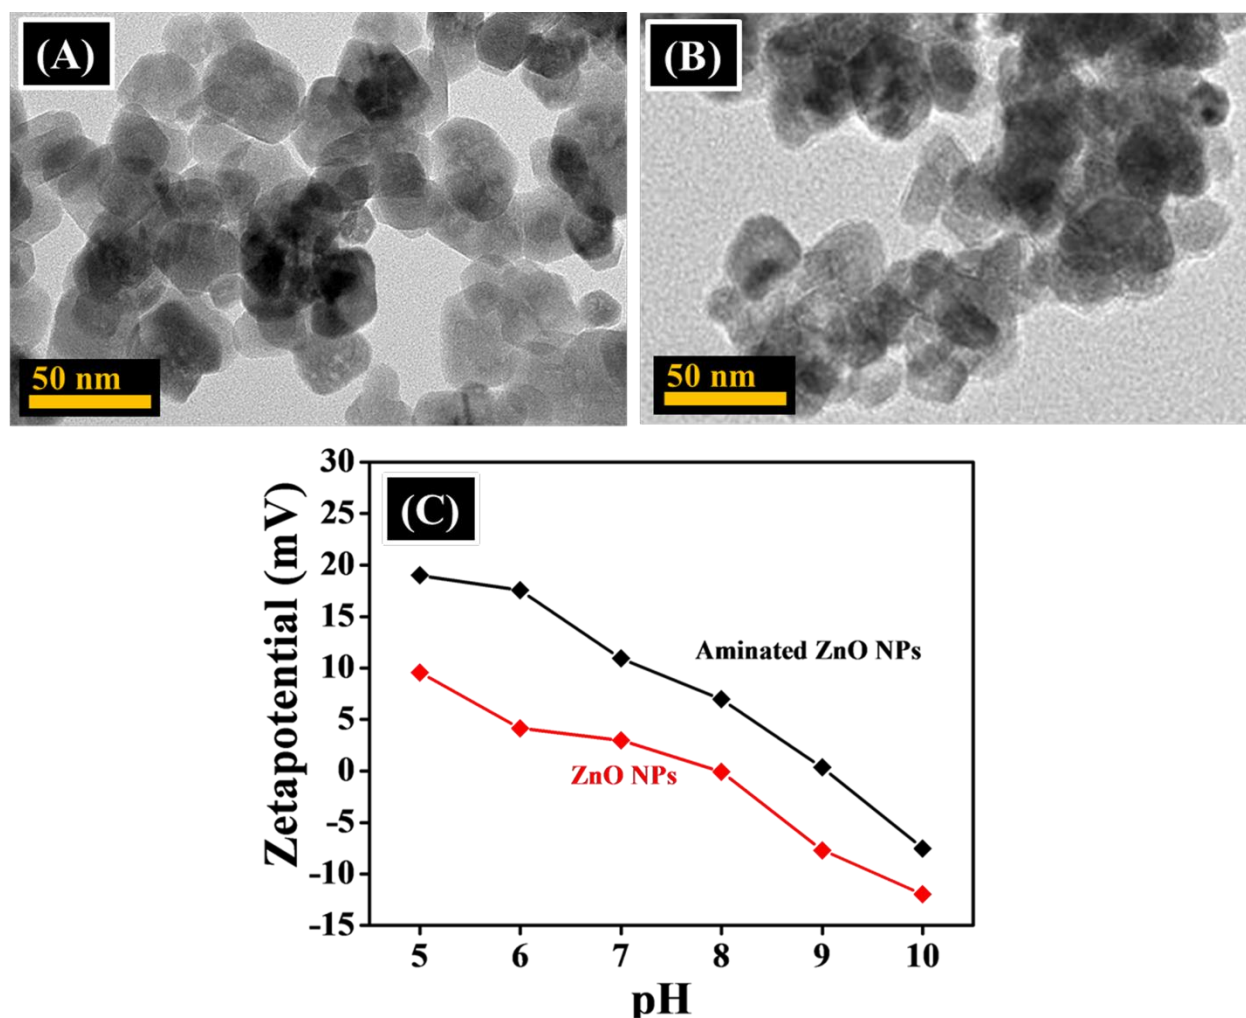

**Fig. S1** TEM images of (A) bare ZnO NPs, (B) aminated ZnO NPs showing a thin film coated on the ZnO surfaces and (C) the surface charges of the bare and aminated ZnO NPs in aqueous solution at different pH measured by zeta potentiometer.

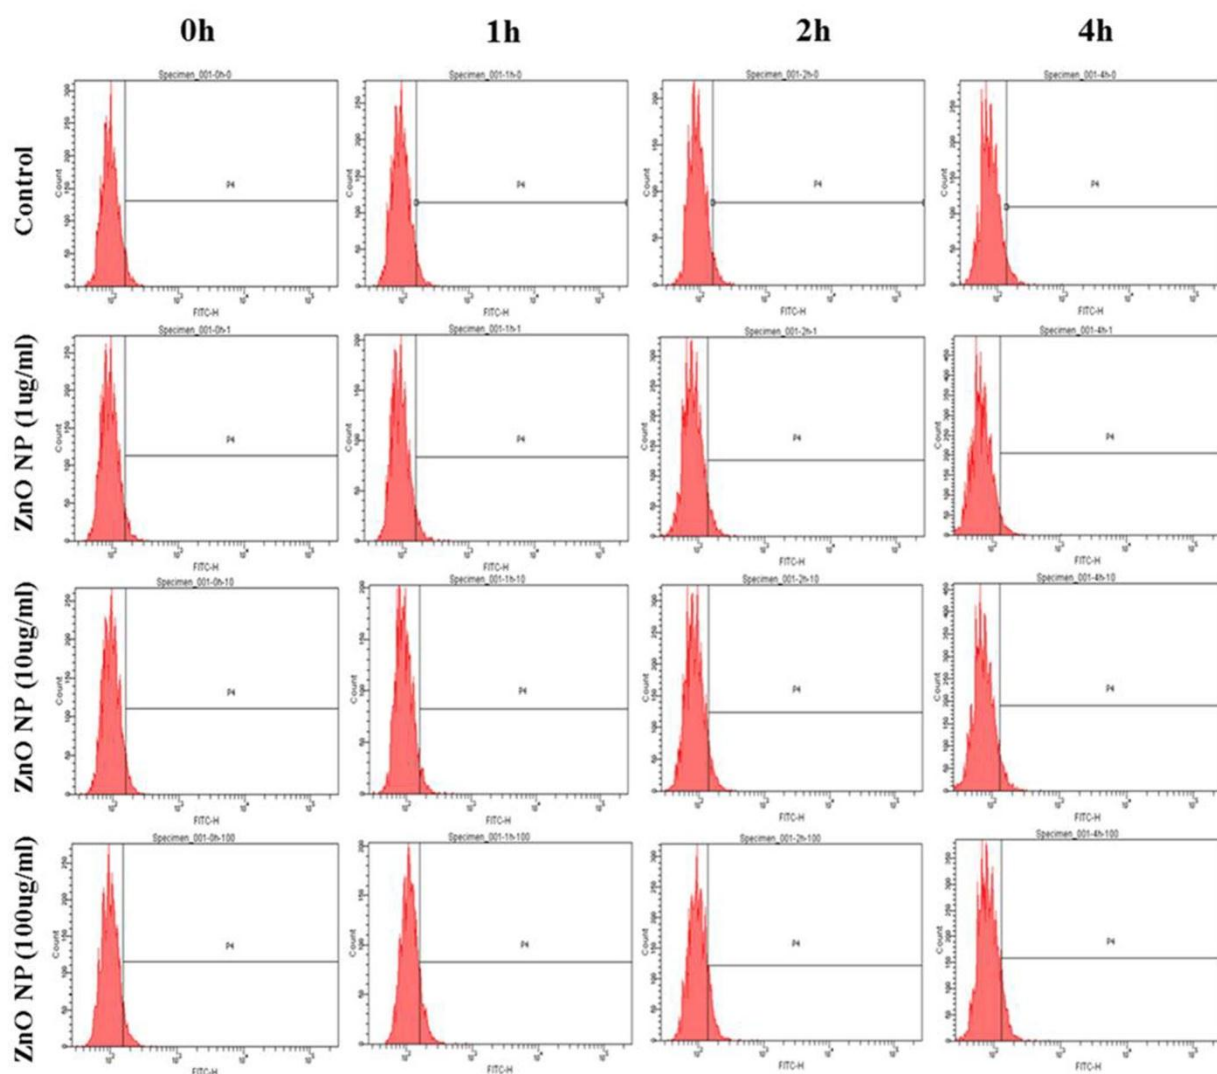

**Fig. S2** Cellular uptake behavior of ZnO NPs. FACS analysis showing untreated and treated RAW264.7 murine macrophages with 1, 10, 100 µg/mL of FITC-ZnO NPs for 1, 2, 3 and 4 hours.

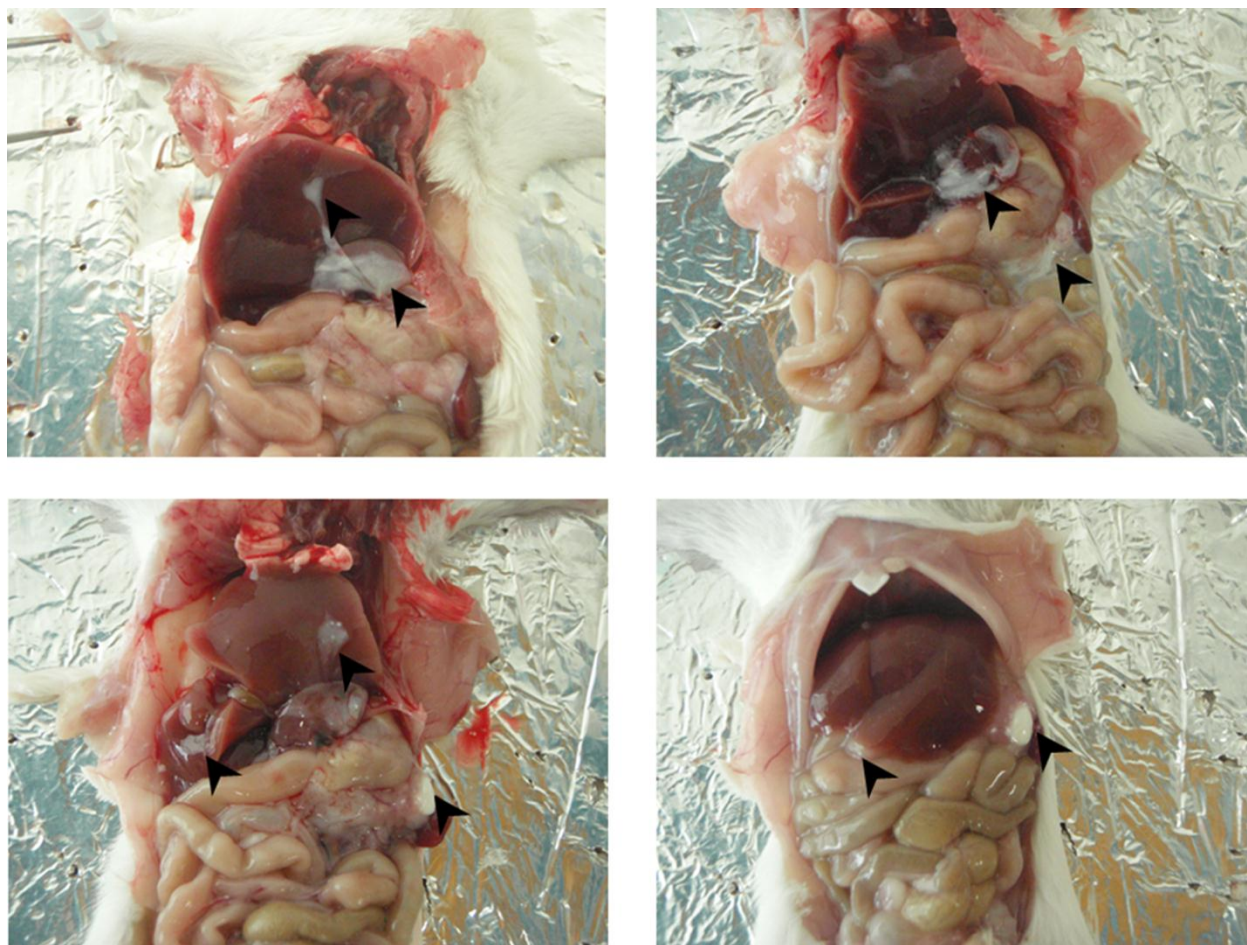

**Fig. S3** Gross observation of mice after intraperitoneal administration with 100 µg/mL ZnO nanoparticles.
